# Supplementary material for: Electrochemical impacts of sheet-like hafnium phosphide and hafnium disulfide catalysts bonded with reduced graphene oxide sheets for bifunctional oxygen reactions in alkaline electrolytes
Source: Royal Society of Chemistry journal article supplement (doi:10.1039/c8ra09598a), 2019-01-01
Supplement: c8ra09598a1.pdf [file c8ra09598a1.pdf]

## Electronic Supporting Information

### **Electrochemical impacts of sheet-like hafnium phosphide and hafnium disulphide catalysts bonded with rGO sheets for bifunctional oxygen reactions in the alkaline electrolytes**

Mayilvel Dinesh Meganathan,<sup>a</sup> Taizhong Huang,<sup>\*a</sup> Hengyi Fang,<sup>a</sup> Jianfeng Mao,<sup>\*b</sup> and Guoxin Sun<sup>a</sup>

<sup>a</sup>School of Chemistry and Chemical Engineering, University of Jinan, 336, West Road of Nanxinzhuang, Jinan, Shandong, 250022, China.

<sup>b</sup>Institute for Superconducting & Electronic Materials, University of Wollongong, Wollongong, NSW 2522, Australia.

Corresponding Authors:

\*Taizhong Huang, Tel +86 531-89736103, Email: [chm\\_huangtz@ujn.edu.cn](mailto:chm_huangtz@ujn.edu.cn);

\*\*Jianfeng Mao, Email: [jmao@uow.edu.au](mailto:jmao@uow.edu.au)

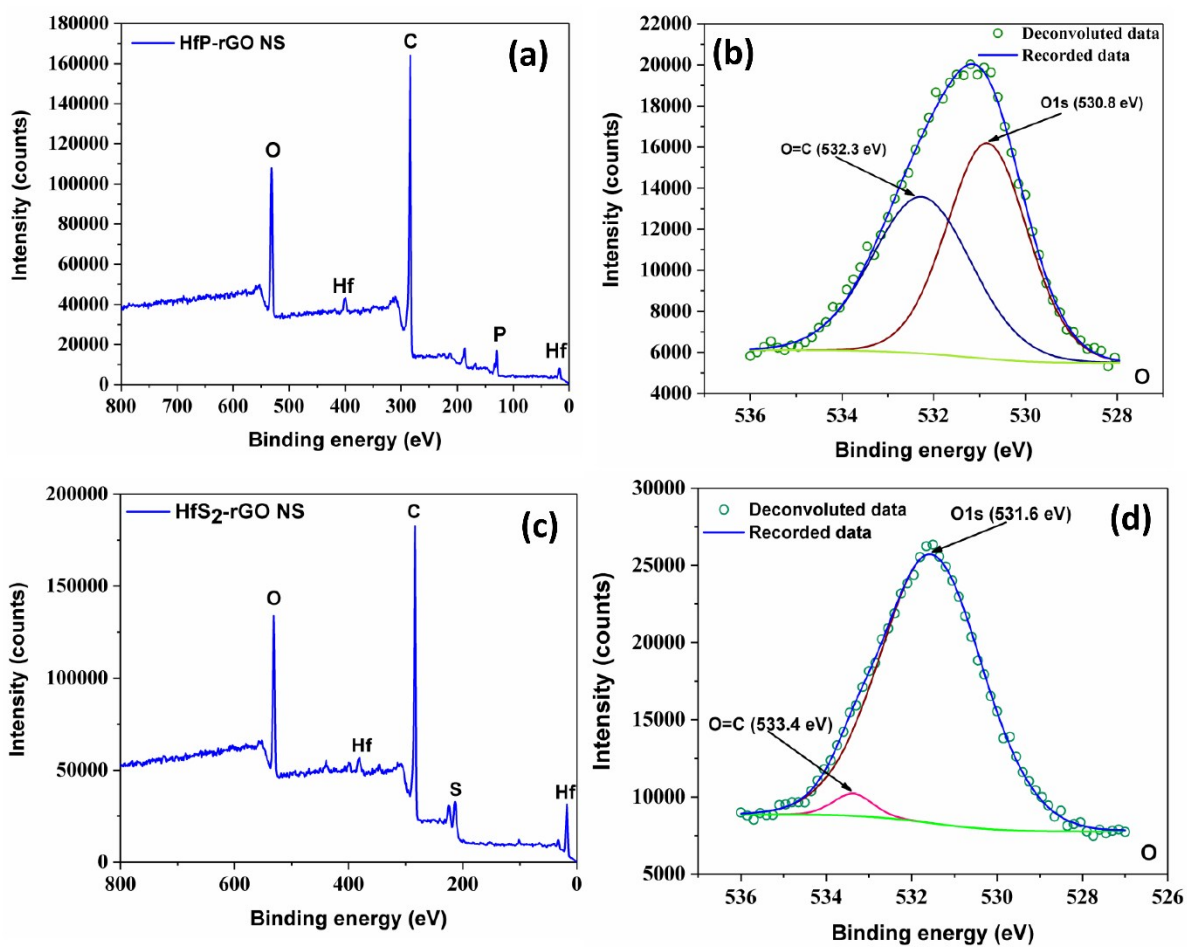

**Fig. S1. (a) XPS spectra and (b) high-resolution oxygen spectra of HfP-rGO nanosheets. (c) XPS spectra and (d) high-resolution oxygen spectra of HfS<sub>2</sub>-rGO nanosheets.**

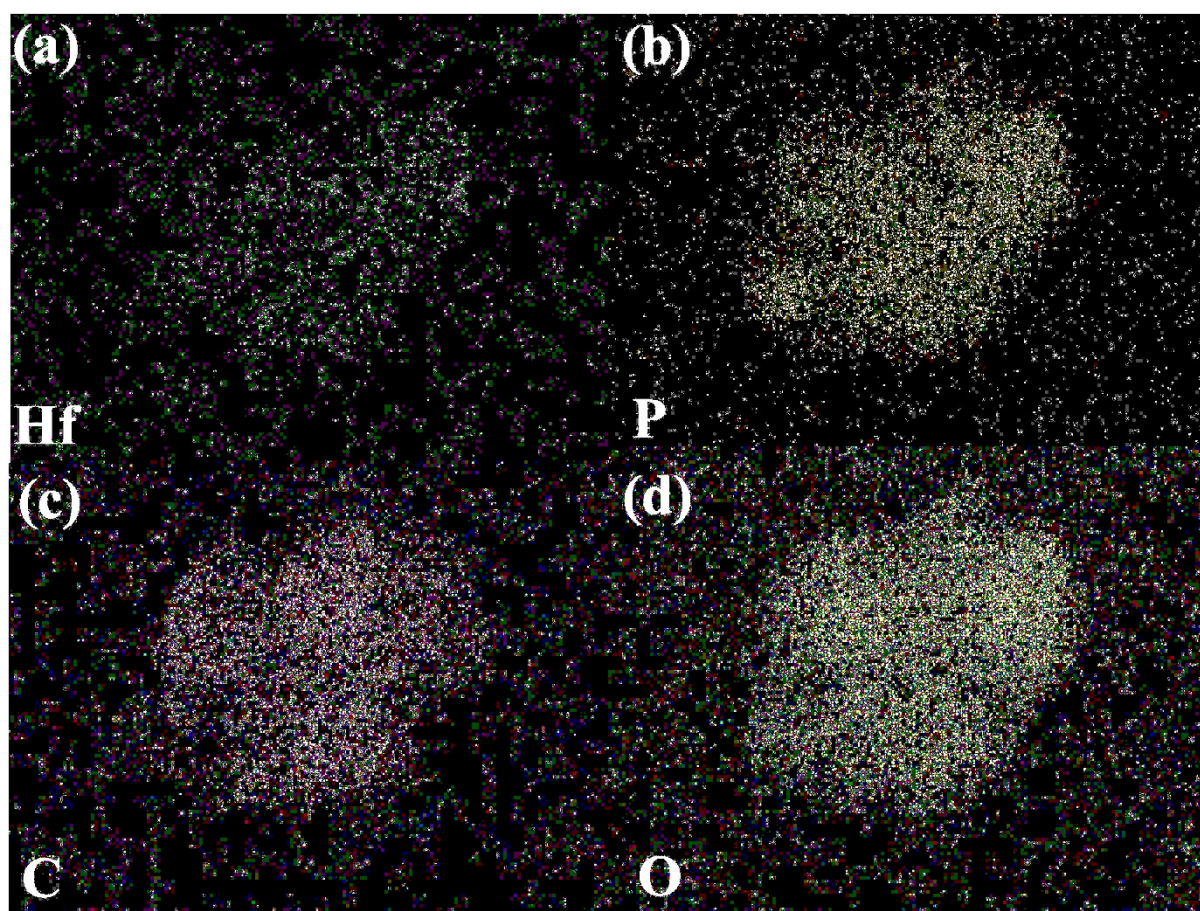

**Fig. S2.** SEM elemental mappings of (a) hafnium, (b) phosphorus, (c) carbon and (d) oxygen for HfP-rGO nanosheets.



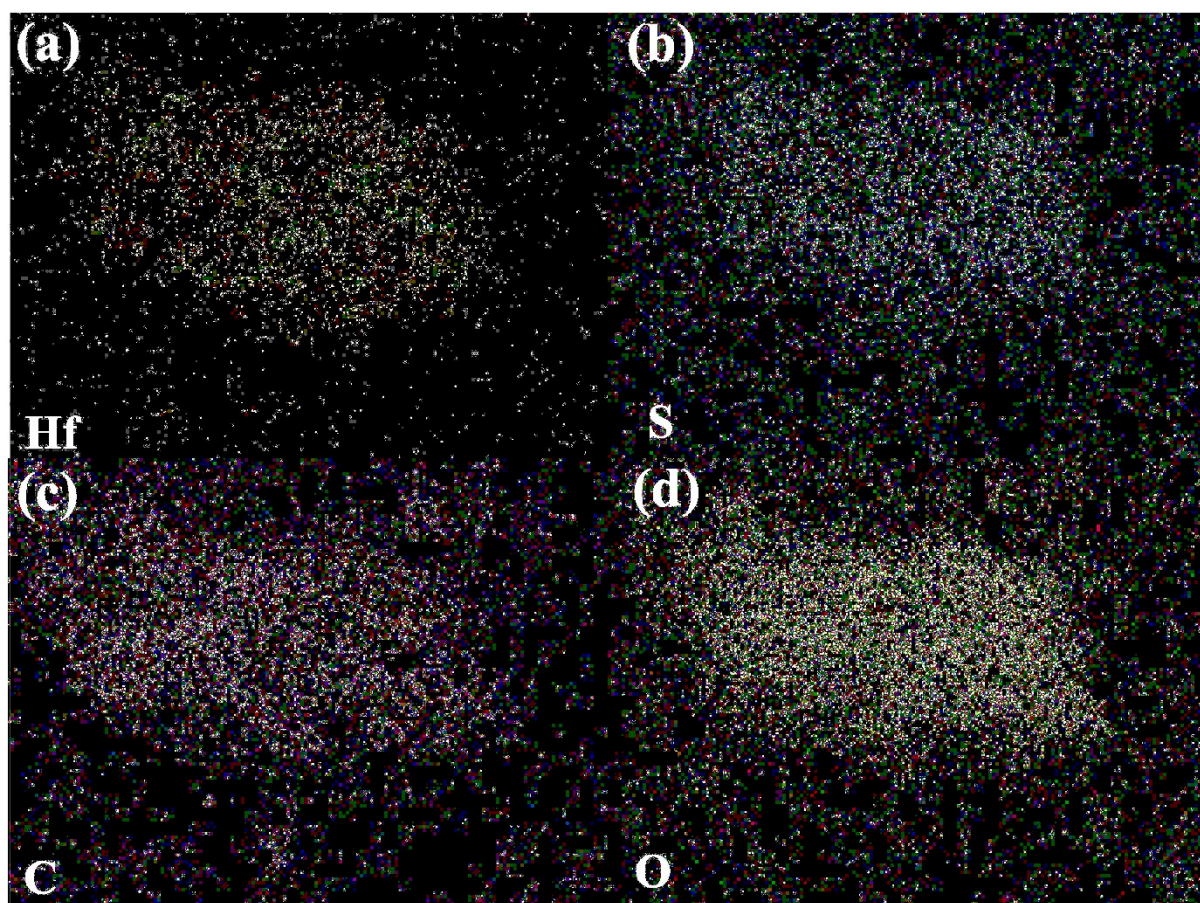

**Fig. S3.** SEM elemental mappings of (a) hafnium, (b) sulphur, (c) carbon and (d) oxygen for **HfS<sub>2</sub>-rGO nanosheets**.

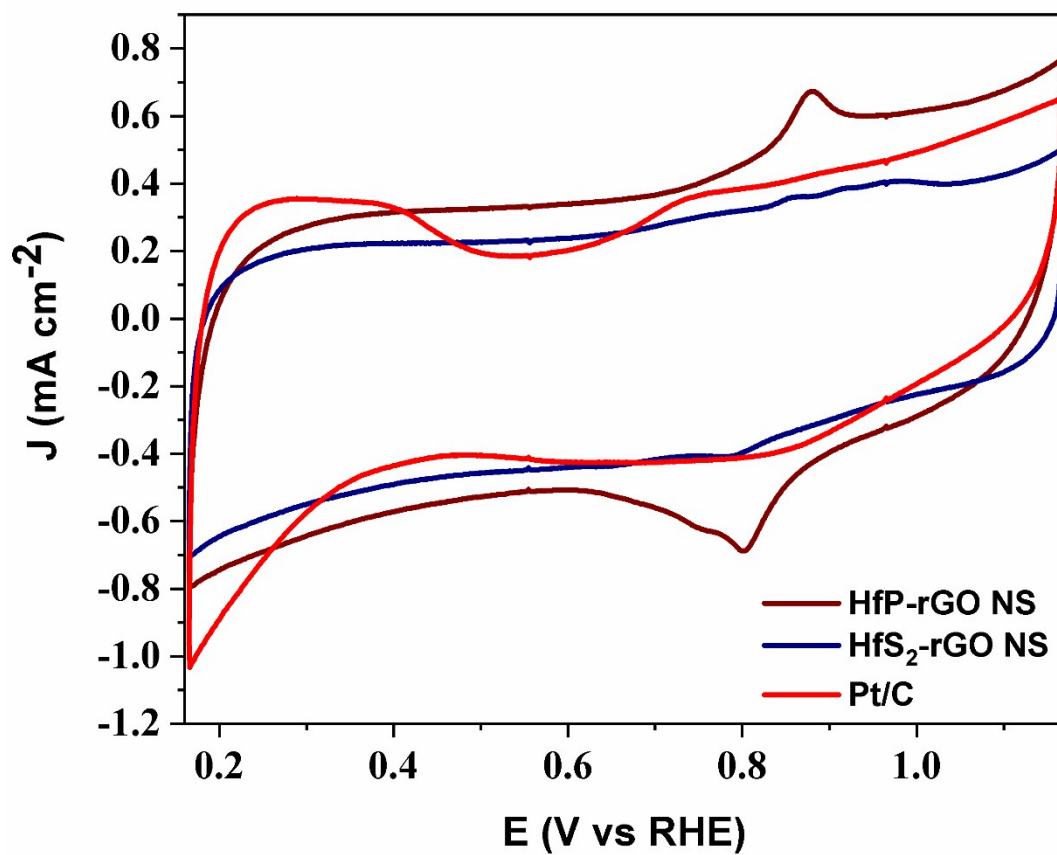

Fig. S4. Cyclic voltammograms of ORR of HfP-rGO NS, HfS<sub>2</sub>-rGO NS and Pt/C in N<sub>2</sub>-saturated 0.1 M KOH electrolyte at a sweep rate of 20  $\text{mV s}^{-1}$ .

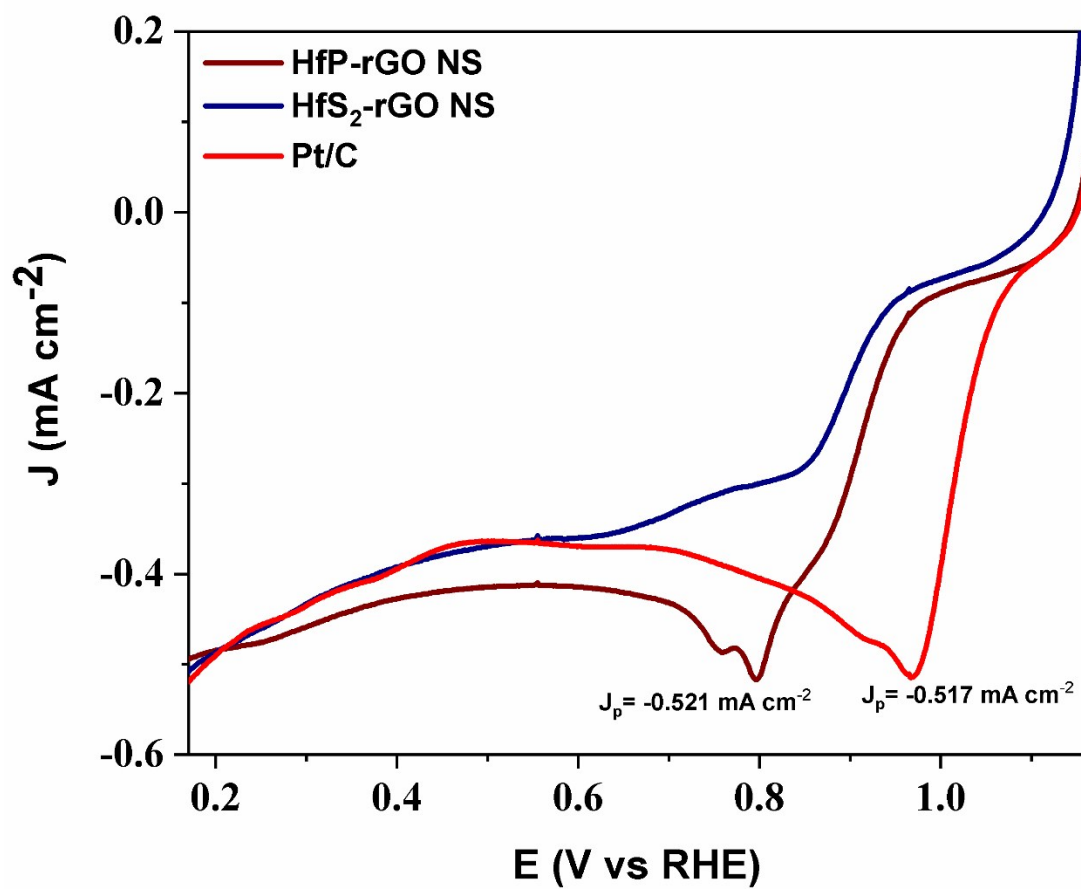

Fig. S5. Linear sweep voltammograms of HfP-rGO NS, HfS<sub>2</sub>-rGO NS and Pt/C at a sweep rate of 5 mV s<sup>-1</sup> during the ORR.

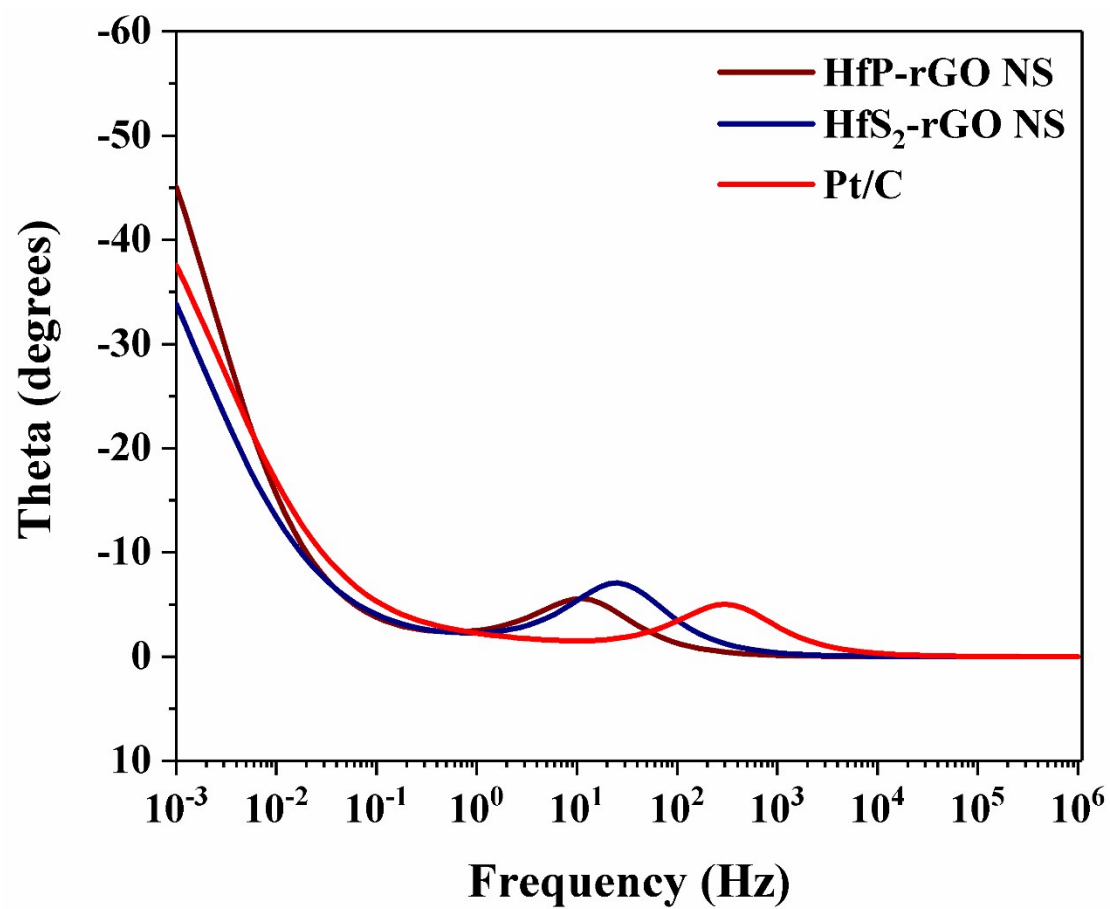

Fig. S6. Bode plots of HfP-rGO NS, HfS<sub>2</sub>-rGO NS and Pt/C for oxygen reduction reaction.

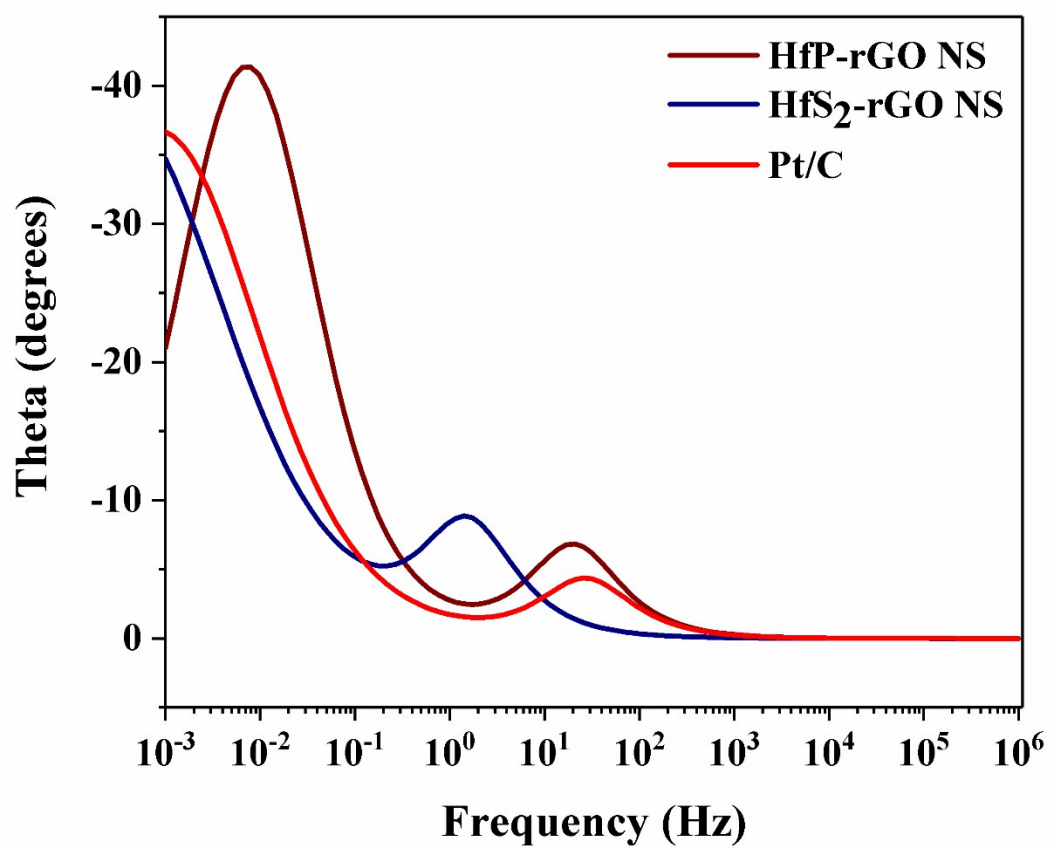

Fig. S7. Bode plots of HfP-rGO NS, HfS<sub>2</sub>-rGO NS and Pt/C for oxygen evolution reaction.
